# Supplementary material
Source: ML conference proceedings conference paper supplement (https://aclanthology.org/2020.findings-emnlp.284)
Supplement: OptionalSupplementaryMaterial [file 2020.findings-emnlp.284.OptionalSupplementaryMaterial.zip]

## A Appendices

### A.1 Details of the parameters used to run the systems

The parameters that are used to run NEO system:

```
-targ aa \
-corpora_type 2 \
-files <REDACTED> \
-whether_csv_suffix no \
-group_size 1 \
-left 5 \
-right 5 \
-whether_pad no \
-lowercase no \
-corp_wc_min 0 \
-whether_archive no \
-expts <REDACTED> \
-num_senses 2 \
-unsup yes \
-dynamic yes \
-senseprobs_string .500/.500 \
-word_rand yes \
-words_prior_type corpus \
-rand_word_mix yes \
-rand_word_mix_level 0.00001 \
-save_starts yes \
-time_stamp yes \
-max_it 500 \
-record_version yes

-targ aa
-corpora_type 2
-files <REDACTED>
-whether_csv_suffix no
-group_size 1
-left 5
-right 5
-whether_pad no
-lowercase no
-filter_ngram_meta_token no
-syn_info 0
excl_targ_nnp is 1
excl_targ_npl is 1
note both above set by -excl_targ_name yes/no
-wlp 1
-targ_wlp 0
-filter_coha_at_token no

-expts <REDACTED>
-num_senses 2
-unsup yes
-sup no
-dynamic yes
-senseprobs_string .500/.500
-sense_rand no
-rand_mix no
-words_prior_type corpus
-word_rand yes
-rand_word_mix yes
-rand_word_mix_level 1e-05
-set_seed yes
-max_it 500
-wordprobs_out em_wordprobs_final
-senseprobs_out em_senseprobs_final
-save_starts yes
-time_stamp yes
-record_version yes
-whether_save_cat_outcomes no
-whether_save_word_stats no
```

The parameters which are used to run SCAN system:

```
text_corpus <REDACTED>
target_words <REDACTED>
bin_corpus_store <REDACTED>
window_size 5
full_corpus_path <REDACTED>
word_corpus_path <REDACTED>
output_path <REDACTED>
kappaF 10.0
kappaK 4.0
a0 7.0
b0 3.0
num_top 2
iterations 500
start_time 1945
end_time 2018
time_interval 1
min_doc_per_word 0
max_docs_per_slice 999999999
```

The parameters which are given to the emergence algorithm “EmergeTime”:

```
ThresholdValue 0
WindowSize 5
Step_increase_threshold_wrtMax 0.04
Min_total_surges_window_increase_wrtMax 0.2
Max_threshold_previouslowyears_wrtMax 0.1
Min_prop_previouslowyears_wrtoutsidetheWindow 0.8
```

## A.2 Dataset Summary

- Medline version: 2019.
- Pubmed Central version: 2019.
- UMLS version: 2018AB-full.
- Language: English.

Table 10 shows the gold standard output (senses and year of emergence), as obtained by the “EmergeTime” emergence detection algorithm based on the original gold data.

Table 11 shows the frequency of occurrences of each Concept for each sense of the ambiguous word as appears in the MEDLINE citations as well as PubMed Central.

Table 12 shows a summary of the final dataset for each ambiguous word.

## A.3 Matching Method Comparisons

This section provides a brief explanation about the issues identified in the two instance-based evaluation methods proposed by (Agirre and Soroa, 2007) for the SemEval 2007 Shared Task and by (Manandhar et al., 2010) for the SemEval 2010 Shared Task. Throughout this section we use the example represented in the following confusion matrix, where  $G_i$  denotes the gold standard sense  $i$  and  $C_j$  denotes the induced cluster  $j$ :

| $C_j$ | $G_1$ | $G_2$ | $G_3$ |
|-------|-------|-------|-------|
| $C_0$ | 15    | 8     | 10    |
| $C_1$ | 1     | 11    | 30    |
| $C_2$ | 60    | 1     | 20    |

### A.3.1 The unsupervised evaluation setting

In this setting, the performance is calculated based on matching every gold sense to one of the predicted clusters. This is done by calculating for every possible pair  $(G_i, C_j)$  the F1-score obtained by matching  $G_i$  with  $C_j$ , then selecting the predicted cluster with the maximum F1-score for every gold sense. By design, this matching method allows different gold classes to be assigned to the same predicted cluster. In particular this is likely to happen when there is imbalance between senses: in such a case, the majority class will influence the assessment of the quality of a clustering solution, since the final the F1-score will be selected based on the majority class. The table below shows the F1-score for every cluster  $C_j$  and every class  $G_i$  for the example presented above. It can be observed that both  $G_2$  and  $G_3$  are matched against cluster  $C_1$ .

| $C_j$ | $G_1$       | $G_2$       | $G_3$       |
|-------|-------------|-------------|-------------|
| $C_0$ | 0.27        | 0.30        | 0.21        |
| $C_1$ | 0.01        | <b>0.35</b> | <b>0.58</b> |
| $C_2$ | <b>0.76</b> | 0.01        | 0.28        |

### A.3.2 The supervised evaluation setting

In this setting which is used in both (Agirre and Soroa, 2007) and (Manandhar et al., 2010), there is no direct matching between the gold standard senses and the predicted clusters. Instead a probabilistic method is used: the mapping is represented by a matrix where each cell represents the conditional probability  $P(G_i|C_j)$  for every pair of predicted cluster and gold sense, and is calculated from the “training set”. It is worth noticing that the same gold class  $G_i$  can obtain the highest probability  $P(G_i|C_j)$  with several predicted clusters,

| Target                      | number of senses | CUI(Sense) | Emergence Year | First Year Occurrence | Target         | number of senses | CUI(Sense) | Emergence Year | First Year Occurrence |
|-----------------------------|------------------|------------|----------------|-----------------------|----------------|------------------|------------|----------------|-----------------------|
| CCI4                        | 2                | C0209338   | 1994           | 1991                  | Cold           | 3                | C0009443   | 1945           | 1945                  |
| Cold                        | 3                | C0024117   | 1998           | 1959                  | CCD            | 2                | C0751951   | 1997           | 1965                  |
| GAG                         | 2                | C0017346   | 1988           | 1982                  | Pharmaceutical | 2                | C0013058   | 1963           | 1963                  |
| CAM                         | 2                | C0178551   | 2002           | 2003                  | Language       | 2                | C0033348   | 1986           | 1958                  |
| EMS                         | 2                | C0015063   | 1974           | 1975                  | TNC            | 2                | C0076088   | 1983           | 1985                  |
| SCD                         | 2                | C0085298   | 1988           | 1950                  | Synopsis       | 2                | C0598501   | 1998           | 1951                  |
| EM                          | 2                | C0014921   | 1973           | 1975                  | Sodium         | 2                | C0037570   | 1945           | 1945                  |
| Plague                      | 2                | C0032066   | 1959           | 1946                  | CP             | 3                | C0033477   | 1971           | 1946                  |
| CIS                         | 2                | C0162854   | 1991           | 1992                  | PHA            | 2                | C0030779   | 2002           | 1976                  |
| IP                          | 2                | C0021069   | 2000           | 1989                  | Leishmaniasis  | 2                | C1548483   | 2005           | 1947                  |
| IA                          | 2                | C0021487   | 1946           | 1946                  | rDNA           | 2                | C0012933   | 1980           | 1981                  |
| CDA                         | 2                | C0092801   | 1982           | 1983                  | HIV            | 2                | C0019693   | 1987           | 1987                  |
| OCD                         | 2                | C0029421   | 1983           | 1984                  | PCA            | 5                | C0030131   | 1972           | 1974                  |
| PCA                         | 5                | C0078944   | 1987           | 1989                  | PCA            | 5                | C0149576   | 1957           | 1957                  |
| PCA                         | 5                | C0429865   | 1999           | 1960                  | LABOR          | 2                | C0022864   | 1945           | 1945                  |
| CH                          | 2                | C0039021   | 1946           | 1946                  | Tax            | 2                | C0144576   | 1992           | 1983                  |
| HCI                         | 2                | C0023443   | 1975           | 1954                  | Gas            | 2                | C0016204   | 1945           | 1945                  |
| PEP                         | 2                | C0135981   | 1978           | 1980                  | TPA            | 2                | C0032143   | 1983           | 1982                  |
| Eels                        | 2                | C0677644   | 2003           | 2004                  | Fe             | 2                | C0376520   | 1995           | 1946                  |
| Cortical                    | 3                | C0001613   | 1945           | 1945                  | NPC            | 2                | C0220756   | 2005           | 2006                  |
| DON                         | 2                | C0028652   | 1979           | 1981                  | CTX            | 2                | C0238052   | 1997           | 1974                  |
| NEUROFIBROMATOSIS           | 2                | C0162678   | 1990           | 1991                  | SARS           | 2                | C1175743   | 2002           | 2002                  |
| TSF                         | 2                | C0021756   | 1976           | 1977                  | Orf            | 2                | C0079941   | 1986           | 1982                  |
| ADP                         | 2                | C0004374   | 1958           | 1959                  | dC             | 2                | C0011485   | 1971           | 1973                  |
| lens                        | 3                | C0023308   | 1951           | 1952                  | MCC            | 2                | C0162804   | 1990           | 1991                  |
| SS                          | 2                | C0085077   | 1990           | 1964                  | WT1            | 2                | C0148873   | 1991           | 1991                  |
| MAF                         | 2                | C0919482   | 2001           | 1998                  | Ice            | 3                | C0534519   | 1990           | 1991                  |
| Lupus                       | 3                | C0024138   | 1945           | 1946                  | Fish           | 2                | C0162789   | 1990           | 1953                  |
| DDS                         | 3                | C0085104   | 1988           | 1990                  | DDS            | 3                | C0950121   | 1999           | 2001                  |
| drinking                    | 2                | C0684271   | 1946           | 1946                  | JP             | 2                | C0031106   | 1946           | 1947                  |
| Pleuropneumonia             | 2                | C0026934   | 1945           | 1945                  | NM             | 2                | C0027972   | 1963           | 1946                  |
| NBS                         | 2                | C0398791   | 2003           | 2002                  | TPO            | 2                | C0021965   | 1974           | 1975                  |
| SARS-associated coronavirus | 2                | C1175743   | 2002           | 2002                  | PR             | 2                | C0034833   | 1972           | 1973                  |
| eCG                         | 2                | C0018064   | 1989           | 1945                  | MBP            | 2                | C0065661   | 1999           | 1984                  |
| US                          | 2                | C0041618   | 1971           | 1945                  | FTC            | 2                | C0206682   | 1992           | 1993                  |
| ERP                         | 2                | C0008310   | 1978           | 1978                  | Phosphorylase  | 2                | C0917783   | 2005           | 1973                  |
| Ion                         | 2                | C0022024   | 1945           | 1946                  | Hemlock        | 2                | C0242872   | 2004           | 2002                  |
| TLC                         | 2                | C0040509   | 1974           | 1959                  | Wasp           | 2                | C0258432   | 1993           | 1994                  |
| INDO                        | 2                | C0021246   | 1961           | 1963                  | ADH            | 2                | C0001942   | 1978           | 1976                  |
| Ala                         | 3                | C0002563   | 1954           | 1953                  | Ganglion       | 2                | C0017067   | 1946           | 1946                  |
| Ganglion                    | 2                | C1258666   | 2006           | 1946                  | BPD            | 2                | C0006287   | 1980           | 1981                  |
| Potassium                   | 2                | C0162800   | 1990           | 1948                  | CPDD           | 2                | C0008838   | 1971           | 1972                  |
| THYMUS                      | 3                | C0040112   | 1948           | 1949                  | Malaria        | 2                | C0206255   | 1991           | 1945                  |
| Cell                        | 2                | C1136359   | 2010           | 1999                  | ANA            | 2                | C0002463   | 1962           | 1963                  |
| ORI                         | 2                | C0242961   | 1993           | 1993                  | cRNA           | 2                | C0056208   | 1981           | 1982                  |
| CAD                         | 2                | C1956346   | 1983           | 1985                  | BSE            | 2                | C0085209   | 1991           | 1991                  |
| Coffee                      | 2                | C0085952   | 2001           | 1962                  | SPR            | 2                | C0597731   | 1996           | 1998                  |
| WBS                         | 2                | C0175702   | 1994           | 1995                  | Cortex         | 2                | C0001614   | 1948           | 1950                  |
| TAT                         | 3                | C0017375   | 1988           | 1989                  | TAT            | 3                | C0039341   | 1983           | 1985                  |
| Glycoside                   | 2                | C0017977   | 1946           | 1946                  | DAT            | 2                | C0114838   | 1989           | 1989                  |
| Ca                          | 3                | C0006754   | 1945           | 1945                  | DBA            | 2                | C1260899   | 1999           | 2001                  |

Table 10: Goldstandard set by emergence detection algorithm “EmergeTime”. The table includes two type of emrgence: the “emergence year” which is provided by the algorithm and the “first year occurrence” which indicates the first year appearance of a sense in the data

| CUI(Sense) | Freq    | Target                    | CUI(Sense) | Freq    | Target                         | CUI(Sense) | Freq    | Target                 | CUI(Sense) | Freq   | Target                      |
|------------|---------|---------------------------|------------|---------|--------------------------------|------------|---------|------------------------|------------|--------|-----------------------------|
| C0001972   | 2273    | AA                        | C0011037   | 698     | DDD                            | C0024138   | 6291    | Lupus                  | C0035331   | 10523  | Retinal                     |
| C0002520   | 301290  | AA                        | C0026256   | 2423    | DDD                            | C0024141   | 249403  | Lupus                  | C0040452   | 34170  | Root                        |
| C0001457   | 22184   | ADA                       | C0010980   | 9593    | DDS                            | C0079786   | 1425    | MAF                    | C0242726   | 342033 | Root                        |
| C0002456   | 1299    | ADA                       | C0085104   | 56838   | DDS                            | C0919482   | 1178    | MAF                    | C1175175   | 33076  | SARS                        |
| C0001942   | 20919   | ADH                       | C0950121   | 326     | DDS                            | C0014063   | 30365   | MBP                    | C1175743   | 29333  | SARS                        |
| C0003779   | 11012   | ADH                       | C0011198   | 1684    | DE                             | C0065661   | 22323   | MBP                    | C1175175   | 33076  | SARS-associated coronavirus |
| C0001459   | 54815   | ADP                       | C0017480   | 80738   | DE                             | C0007129   | 12514   | MCC                    | C1175743   | 29333  | SARS-associated coronavirus |
| C0004374   | 579     | ADP                       | C0011848   | 9160    | DI                             | C0162804   | 511     | MCC                    | C0002895   | 57045  | SCD                         |
| C0002736   | 125309  | ALS                       | C0032246   | 22524   | DI                             | C0024518   | 43630   | MHC                    | C0085298   | 23885  | SCD                         |
| C0003372   | 4332    | ALS                       | C0012020   | 925     | DON                            | C0027100   | 18485   | MHC                    | C0037231   | 539    | SLS                         |
| C0002463   | 1234    | ANA                       | C0028652   | 1355    | DON                            | C0024487   | 45898   | MRS                    | C0037506   | 29240  | SLS                         |
| C0003243   | 16995   | ANA                       | C0012238   | 26483   | Digestive                      | C0025235   | 1227    | MRS                    | C0164209   | 4815   | SPR                         |
| C0001625   | 74305   | Adrenal                   | C0012240   | 9757    | Digestive                      | C0024530   | 332626  | Malaria                | C0597731   | 34855  | SPR                         |
| C0014563   | 97328   | Adrenal                   | C0013710   | 42611   | EGG                            | C0206255   | 25609   | Malaria                | C0039101   | 10219  | SS                          |
| C0001898   | 38827   | Ala                       | C0029974   | 57923   | EGG                            | C0001629   | 10489   | Medullary              | C0085077   | 4191   | SS                          |
| C0002563   | 29471   | Ala                       | C0014921   | 2786    | EM                             | C0025148   | 23198   | Medullary              | C0162731   | 1529   | STEM                        |
| C0051405   | 13117   | Ala                       | C0026019   | 92207   | EM                             | C0026131   | 224599  | Milk                   | C0242767   | 25397  | STEM                        |
| C0225984   | 790     | Arteriovenous Anastomoses | C0013961   | 37565   | EMS                            | C0026140   | 81129   | Milk                   | C0036319   | 12759  | Schistosoma mansoni         |
| C0684204   | 803     | Arteriovenous Anastomoses | C0015063   | 4629    | EMS                            | C0027960   | 12451   | Moles                  | C0036330   | 8277   | Schistosoma mansoni         |
| C0039277   | 6282    | Astragalus                | C0008310   | 30216   | ERP                            | C0324740   | 2684    | Moles                  | C0037473   | 265756 | Sodium                      |
| C0330845   | 2603    | Astragalus                | C0015214   | 54672   | ERP                            | C0027819   | 80894   | NBS                    | C0037570   | 33518  | Sodium                      |
| C0023434   | 93519   | B-Cell Leukemia           | C0015230   | 10625   | ERUPTION                       | C0398791   | 970     | NBS                    | C0038160   | 7046   | Staph                       |
| C2004493   | 288     | B-Cell Leukemia           | C1533692   | 7678    | ERUPTION                       | C0085113   | 9357    | NEUROFIBROMATOSIS      | C0038170   | 30303  | Staph                       |
| C0006298   | 43500   | BAT                       | C0013671   | 7236    | Eels                           | C0162678   | 2359    | NEUROFIBROMATOSIS      | C0038280   | 13603  | Sterilization               |
| C0008139   | 88303   | BAT                       | C0677644   | 347     | Eels                           | C0025033   | 6146    | NM                     | C0038288   | 5469   | Sterilization               |
| C0005740   | 55247   | BLM                       | C0014563   | 97328   | Epi                            | C0027972   | 4093    | NM                     | C0038395   | 6581   | Strep                       |
| C0005859   | 6356    | BLM                       | C0014582   | 19296   | Epi                            | C0028587   | 17697   | NPC                    | C0038402   | 29450  | Strep                       |
| C0006012   | 29371   | BPD                       | C0014772   | 11901   | Erythrocytes                   | C0220756   | 3897    | NPC                    | C0039062   | 125608 | Synopsis                    |
| C0006287   | 21233   | BPD                       | C0014792   | 353039  | Erythrocytes                   | C0006147   | 141203  | Nurse                  | C0598501   | 4857   | Synopsis                    |
| C0006137   | 140353  | BR                        | C0015259   | 623402  | Exercises                      | C0028661   | 98472   | Nurse                  | C0017375   | 2214   | TAT                         |
| C0006222   | 8196    | BR                        | C0452240   | 30855   | Exercises                      | C0006147   | 139863  | Nursing                | C0039341   | 27001  | TAT                         |
| C0005902   | 7780    | BSA                       | C0015625   | 18453   | FA                             | C0028677   | 32380   | Nursing                | C0039756   | 375    | TAT                         |
| C0036774   | 65211   | BSA                       | C0016410   | 66996   | FA                             | C0028768   | 53452   | OC                     | C0040975   | 8      | TEM                         |
| C0085105   | 5677    | BSE                       | C0041713   | 588     | FTC                            | C0029421   | 4012    | OC                     | C0678118   | 38610  | TEM                         |
| C0085209   | 15801   | BSE                       | C0206682   | 6844    | FTC                            | C0028905   | 8361    | OH                     | C0040112   | 965    | THYMUS                      |
| C0006033   | 7632    | Borrelia                  | C0032580   | 28787   | Familial Adenomatous Polyposis | C0063146   | 29590   | OH                     | C0040113   | 117518 | THYMUS                      |
| C0021498   | 37268   | Borrelia                  | C0162832   | 18516   | Familial Adenomatous Polyposis | C0206601   | 2221    | ORI                    | C1015036   | 1806   | THYMUS                      |
| C0006304   | 4504    | Brucella abortus          | C0302583   | 531868  | Fe                             | C0242961   | 13154   | ORI                    | C0008569   | 21429  | TLC                         |
| C0302363   | 2154    | Brucella abortus          | C0376520   | 40837   | Fe                             | C0013570   | 1832    | Orf                    | C0040509   | 3718   | TLC                         |
| C0011905   | 5723    | CAD                       | C0016163   | 200509  | Fish                           | C0079941   | 84657   | Orf                    | C0039493   | 22957  | TMJ                         |
| C1956346   | 165919  | CAD                       | C0162789   | 104590  | Fish                           | C0033036   | 1149    | PAC                    | C0039496   | 6062   | TMJ                         |
| C0007578   | 31452   | CAM                       | C0018120   | 45586   | Follicle                       | C0949780   | 204     | PAC                    | C0040079   | 924    | TMP                         |
| C0178551   | 7568    | CAM                       | C0221971   | 26046   | Follicle                       | C0032172   | 55064   | PAF                    | C0041041   | 14171  | TMP                         |
| C0008928   | 2201    | CCD                       | C0018120   | 103753  | Follicles                      | C0037019   | 590     | PAF                    | C0076088   | 20377  | TNC                         |
| C0751951   | 950     | CCD                       | C0221971   | 23601   | Follicles                      | C0030131   | 2313    | PCA                    | C0077400   | 6334   | TNC                         |
| C0007022   | 19811   | CC4                       | C0017346   | 4737    | GAG                            | C0030625   | 2766    | PCA                    | C0041070   | 6365   | TNT                         |
| C0209338   | 3149    | CC4                       | C0017973   | 45430   | GAG                            | C0078944   | 12351   | PCA                    | C0077404   | 17258  | TNT                         |
| C0002876   | 1338    | CDA                       | C0017067   | 15625   | Ganglion                       | C0149576   | 2037    | PCA                    | C0032143   | 52834  | TPA                         |
| C0092801   | 6319    | CDA                       | C1258666   | 2093    | Ganglion                       | C0429865   | 65444   | PCA                    | C0039654   | 89585  | TPA                         |
| C0011485   | 5467    | CDR                       | C0016204   | 2599    | Gas                            | C0032447   | 93888   | PCB                    | C0021965   | 15262  | TPO                         |
| C0021024   | 5069    | CDR                       | C0017110   | 53043   | Gas                            | C0033223   | 2722    | PCB                    | C0040052   | 15428  | TPO                         |
| C0008115   | 359471  | CH                        | C0007158   | 3755    | Glycoside                      | C0022521   | 6989    | PCD                    | C0021759   | 4254   | TRF                         |
| C0039021   | 25247   | CH                        | C0017977   | 21871   | Glycoside                      | C0162638   | 1233594 | PCD                    | C0040162   | 43836  | TRF                         |
| C0008107   | 20392   | CI                        | C0020259   | 10437   | HCl                            | C0030855   | 8811    | PCP                    | C0021756   | 177829 | TSF                         |
| C0022326   | 6259    | CI                        | C0033443   | 9878    | HCl                            | C0031381   | 19265   | PCP                    | C0040052   | 15633  | TSF                         |
| C0007099   | 16439   | CIS                       | C0021760   | 359798  | HGF                            | C0031642   | 4608    | PEP                    | C0041484   | 35723  | TYR                         |
| C0162854   | 268     | CIS                       | C0062534   | 72879   | HGF                            | C0135981   | 1381    | PEP                    | C0041485   | 116975 | TYR                         |
| C0265252   | 358     | CLS                       | C0036220   | 43775   | HHV 8                          | C0030779   | 319     | PHA                    | C0039371   | 17230  | Tax                         |
| C0343084   | 870     | CLS                       | C0376526   | 53066   | HHV 8                          | C0031858   | 21092   | PHA                    | C0144576   | 107373 | Tax                         |
| C0007789   | 59567   | CP                        | C0019682   | 131115  | HIV                            | C0017360   | 3182    | POL                    | C0013220   | 41988  | Tolerance                   |
| C0008925   | 20764   | CP                        | C0019693   | 1619519 | HIV                            | C0032356   | 35172   | POL                    | C0020963   | 50759  | Tolerance                   |
| C0033477   | 6615    | CP                        | C0079504   | 1925    | HPS                            | C0034044   | 9655    | PR                     | C0010414   | 16808  | Torula                      |
| C0008838   | 273762  | CPDD                      | C0242994   | 2350    | HPS                            | C0034833   | 67210   | PR                     | C0010415   | 6893   | Torula                      |
| C0553730   | 2951    | CPDD                      | C0010343   | 9044    | HR                             | C0032624   | 9305    | PVC                    | C0041618   | 350047 | US                          |
| C0010132   | 75466   | CRF                       | C0018810   | 281856  | HR                             | C0151636   | 8629    | PVC                    | C0041703   | 454576 | US                          |
| C0022661   | 118092  | CRF                       | C0007947   | 1617    | Haemophilus ducreyi            | C0026780   | 12594   | Parotitis              | C0007799   | 6839   | Ventricles                  |
| C0010583   | 65189   | CTX                       | C0018481   | 996     | Haemophilus ducreyi            | C0030583   | 2094    | Parotitis              | C0018827   | 227871 | Ventricles                  |
| C0238052   | 1613    | CTX                       | C0242872   | 228     | Hemlock                        | C0013058   | 4388    | Pharmaceutical         | C0004903   | 4477   | WBS                         |
| C0006675   | 1059398 | Ca                        | C0949851   | 1302    | Hemlock                        | C0031336   | 6742    | Pharmaceutical         | C0175702   | 10568  | WBS                         |
| C0006754   | 56794   | Ca                        | C0626201   | 4209    | Heregulin                      | C0031705   | 182933  | Phosphorus             | C0027708   | 24437  | WT1                         |
| C0006823   | 109981  | Ca                        | C0752253   | 2589    | Heregulin                      | C0080014   | 14909   | Phosphorus             | C0148873   | 24069  | WT1                         |
| C0006767   | 7709    | Callus                    | C0019552   | 26952   | Hip                            | C0017916   | 8445    | Phosphorylase          | C0043041   | 23585  | Wasp                        |
| C0376154   | 703     | Callus                    | C0022122   | 792     | Hip                            | C0917783   | 362     | Phosphorylase          | C0258432   | 12777  | Wasp                        |
| C0030163   | 30914   | Cardiac pacemaker         | C0021487   | 3203    | IA                             | C0032064   | 18717   | Plague                 | C0043395   | 6033   | Yellow Fever                |
| C0037189   | 9587    | Cardiac pacemaker         | C0022037   | 6816    | IA                             | C0032066   | 1632    | Plague                 | C0301508   | 2841   | Yellow Fever                |
| C0007634   | 55017   | Cell                      | C0021246   | 63672   | INDO                           | C0011389   | 39203   | Plaque                 | C0056208   | 1886   | cRNA                        |
| C1136359   | 9493    | Cell                      | C0021247   | 18357   | INDO                           | C0033463   | 23512   | Plaque                 | C1321571   | 1991   | cRNA                        |
| C0011343   | 7360    | Cement                    | C0021069   | 31909   | IP                             | C0005821   | 408339  | Platelet               | C0011485   | 5280   | dC                          |
| C1706094   | 12050   | Cement                    | C0021171   | 2233    | IP                             | C0032181   | 85633   | Platelet               | C0012764   | 3357   | dC                          |
| C0008354   | 39019   | Cholera                   | C0020746   | 19914   | Ice                            | C0026934   | 21720   | Pleurpneumonia         | C0001948   | 268465 | drinking                    |
| C0008359   | 9144    | Cholera                   | C0025611   | 54867   | Ice                            | C0032241   | 745     | Pleurpneumonia         | C0684271   | 14483  | drinking                    |
| C0008778   | 68269   | Cilia                     | C0534519   | 28409   | Ice                            | C0032533   | 7620    | Polymyalgia Rheumatica | C0018064   | 1569   | eCG                         |
| C0015422   | 1920    | Cilia                     | C0022023   | 96689   | Ion                            | C0039483   | 17436   | Polymyalgia Rheumatica | C1623258   | 164449 | eCG                         |
| C0009237   | 38237   | Coffee                    | C0022024   | 8402    | Ion                            | C0032821   | 226683  | Potassium              | C0023308   | 1512   | lens                        |
| C0085952   | 11005   | Coffee                    | C0022077   | 23847   | Iris                           | C0162800   | 8838    | Potassium              | C0023317   | 90021  | lens                        |
| C0009264   | 154042  | Cold                      | C1001362   | 651     | Iris                           | C0016538   | 28969   | Projection             | C0023318   | 7839   | lens                        |
| C0009443   | 8249    | Cold                      | C0022341   | 143137  | JP                             | C0033363   | 499     | Projection             | C0019829   | 82988  | lymphogranulomatosis        |
| C0024117   | 346332  | Cold                      | C0031106   | 3514    | JP                             | C0002893   | 1540    | RA                     | C0036202   | 53699  | lymphogranulomatosis        |
| C0009563   | 9774    | Compliance                | C0022864   | 46915   | LABOR                          | C0003873   | 431693  | RA                     | C0022171   | 9191   | pl                          |
| C1321605   | 55901   | Compliance                | C0043227   | 53100   | LABOR                          | C0034625   | 7321    | RA                     | C0812425   | 5487   | pl                          |
| C0001614   | 395     | Cortex                    | C0006147   | 139863  | Lactation                      | C0035335   | 38859   | RB                     | C0032009   | 5034   | posterior pituitary         |
| C0007776   | 324010  | Cortex                    | C0022925   | 64698   | Lactation                      | C0035930   | 5042    | RB                     | C0032017   | 621    | posterior pituitary         |
| C0001613   | 11909   | Cortical                  | C0023008   | 105230  | Language                       | C0014772   | 11901   | RB                     | C0012931   | 4088   | rDNA                        |
| C0007776   | 324010  | Cortical                  | C0033348   | 4933    | Language                       | C0014792   | 353039  | RBC                    | C0012933   | 55357  | rDNA                        |
| C0022655   | 16714   | Cortical                  | C0023078   | 32290   | Laryngeal                      | C0035236   | 51084   | RSV                    | C0040395   | 10463  | tomography                  |
| C0040441   | 966     | Crack                     | C0023081   | 917     | Laryngeal                      | C0086943   | 1304    | RSV                    | C0040405   | 818770 | tomography                  |
| C0085163   | 5507    | Crack                     | C0752045   | 579     | Lawsonia                       | C0851346   | 15849   | Radiation              | C0042615   | 17713  | veterinary                  |
| C0002395   | 567548  | DAT                       | C1068388   | 199     | Lawsonia                       | C1522449   | 146445  | Radiation              | C0206212   | 1191   | veterinary                  |
| C0114838   | 31063   | DAT                       | C0023281   | 14290   | Leishmaniasis                  | C0035203   | 99273   | Respiration            |            |        |                             |
| C0025923   | 3665    | DBA                       | C1548483   | 1406    | Leishmaniasis                  | C0282636   | 20581   | Respiration            |            |        |                             |
| C1260899   | 3084    | DBA                       | C0024131   | 2274    | Lupus                          | C0035298   | 373380  | Retinal                |            |        |                             |

Table 11: Frequency of every sense: the number of occurrences of an ambiguous word in Medline (title and abstract) and PubMed Central annotated with MeSH which corresponds to the CUI

| Target           | Org Years | Org Size  | Fill Size | Excluded | %Included | Target | Org Years         | Org Size  | Fill Size | Excluded | %Included |      |        |                                |           |           |         |         |      |        |
|------------------|-----------|-----------|-----------|----------|-----------|--------|-------------------|-----------|-----------|----------|-----------|------|--------|--------------------------------|-----------|-----------|---------|---------|------|--------|
| AA               | 1945-2019 | 1945-2018 | 303572    | 303563   | 9         | 100.00 | ADA               | 1946-2018 | 1955-2018 | 23516    | 23483     | 33   | 99.86  | ADH                            | 1948-2018 | 1975-2018 | 32148   | 31931   | 217  | 99.32  |
| ADP              | 1947-2018 | 1956-2018 | 55406     | 53994    | 12        | 99.98  | ALS               | 1946-2018 | 1948-2018 | 120646   | 120641    | 5    | 100.00 | ANA                            | 1950-2018 | 1962-2018 | 18246   | 18229   | 17   | 99.91  |
| Adrenal          | 1945-2018 | 1945-2018 | 171633    | 171633   | 0         | 100.00 | Ala               | 1945-2019 | 1947-2018 | 81423    | 81415     | 8    | 99.99  | Arteriovenous Anastomoses      | 1945-2018 | 1950-2018 | 1602    | 1593    | 9    | 99.44  |
| Asargatus        | 1947-2018 | 1947-2018 | 8888      | 8885     | 3         | 99.97  | B-Cell Leukemia   | 1946-2018 | 1986-2018 | 94020    | 94020     | 0    | 100.00 | BAT                            | 1945-2018 | 1946-2018 | 131806  | 131803  | 3    | 100.00 |
| BLA              | 1954-2018 | 1971-2018 | 6108      | 6103     | 5         | 99.99  | BPD               | 1952-2018 | 1980-2018 | 50606    | 50604     | 2    | 100.00 | BR                             | 1945-2019 | 1946-2018 | 148563  | 148549  | 14   | 99.99  |
| BMA              | 1947-2019 | 1952-2018 | 73012     | 72991    | 21        | 99.97  | BSE               | 1952-2018 | 1991-2018 | 21486    | 21478     | 8    | 99.96  | Borrelia                       | 1946-2018 | 1979-2018 | 45067   | 44900   | 167  | 99.63  |
| Brucella abortus | 1943-2018 | 1946-2018 | 6659      | 6658     | 1         | 99.98  | CAD               | 1945-2018 | 1983-2018 | 172675   | 171642    | 1033 | 99.40  | CAM                            | 1945-2018 | 1981-2018 | 39178   | 39020   | 158  | 99.60  |
| CCD              | 1946-2018 | 1965-2018 | 3237      | 3151     | 86        | 97.34  | CC14              | 1945-2018 | 1946-2018 | 22962    | 22960     | 2    | 99.99  | CDA                            | 1979-2018 | 1979-2018 | 7657    | 7657    | 0    | 100.00 |
| CDR              | 1958-2018 | 1973-2018 | 10565     | 10536    | 29        | 99.73  | CH                | 1945-2019 | 1946-2018 | 384806   | 384718    | 88   | 99.98  | CI                             | 1945-2018 | 1946-2018 | 26664   | 26651   | 13   | 99.95  |
| CIS              | 1946-2018 | 1972-2018 | 17176     | 16707    | 469       | 97.27  | CLS               | 1996-2018 | 1996-2018 | 1228     | 1228      | 0    | 100.00 | CP                             | 1945-2019 | 1946-2018 | 86949   | 86946   | 3    | 100.00 |
| CPDD             | 1960-2018 | 1971-2018 | 276767    | 276713   | 54        | 99.98  | CRP               | 1950-2018 | 1954-2018 | 193578   | 193558    | 14   | 99.99  | CTX                            | 1951-2018 | 1960-2018 | 66806   | 66802   | 4    | 99.99  |
| Ca               | 1945-2019 | 1945-2018 | 1226490   | 1226173  | 317       | 99.97  | Callus            | 1946-2018 | 1972-2018 | 8609     | 8412      | 197  | 97.71  | Cardiac pacemaker              | 1949-2018 | 1954-2018 | 40512   | 40501   | 11   | 99.97  |
| Cell             | 1945-2018 | 1969-2018 | 65388     | 64510    | 878       | 98.66  | Cement            | 1946-2018 | 1957-2018 | 19531    | 19410     | 121  | 99.38  | Cholera                        | 1945-2018 | 1945-2018 | 48163   | 48163   | 0    | 100.00 |
| Cilia            | 1945-2018 | 1950-2018 | 70204     | 70189    | 15        | 99.98  | Coffee            | 1946-2019 | 1960-2018 | 49497    | 49242     | 255  | 99.48  | Cold                           | 1945-2019 | 1945-2018 | 508623  | 508623  | 3    | 100.00 |
| Compliance       | 1952-2019 | 1974-2018 | 65781     | 65675    | 106       | 99.84  | Cortex            | 1945-2018 | 1945-2018 | 324405   | 324405    | 0    | 100.00 | Cortical                       | 1945-2018 | 1945-2018 | 352633  | 352633  | 0    | 100.00 |
| Crack            | 1948-2018 | 1986-2018 | 6562      | 6473     | 89        | 98.64  | DAT               | 1946-2018 | 1974-2018 | 598752   | 598611    | 141  | 99.98  | DBA                            | 1947-2018 | 1972-2018 | 6809    | 6749    | 60   | 99.12  |
| DDD              | 1946-2018 | 1962-2018 | 3167      | 3121     | 46        | 98.55  | DDS               | 1946-2018 | 1960-2018 | 68853    | 66757     | 96   | 99.86  | DE                             | 1945-2019 | 1945-2018 | 82423   | 82422   | 1    | 100.00 |
| DI               | 1945-2018 | 1946-2018 | 31685     | 31684    | 1         | 100.00 | DON               | 1948-2018 | 1975-2018 | 2313     | 2280      | 33   | 98.57  | Digestive                      | 1945-2019 | 1945-2018 | 36241   | 36240   | 1    | 100.00 |
| EGG              | 1945-2019 | 1945-2018 | 100543    | 100534   | 9         | 99.99  | EM                | 1945-2018 | 1946-2018 | 94994    | 94993     | 1    | 100.00 | EMS                            | 1945-2018 | 1967-2018 | 42361   | 42194   | 167  | 99.61  |
| ERP              | 1948-2018 | 1956-2018 | 84901     | 84888    | 13        | 99.98  | ERUPTION          | 1944-2018 | 1945-2018 | 18305    | 18303     | 2    | 99.99  | Eels                           | 1946-2018 | 1951-2018 | 7588    | 7583    | 5    | 99.93  |
| Epi              | 1945-2018 | 1945-2018 | 116624    | 116624   | 0         | 100.00 | Erythrocytes      | 1945-2019 | 1945-2018 | 364943   | 364940    | 3    | 100.00 | Exercises                      | 1946-2018 | 1945-2018 | 654282  | 654257  | 25   | 100.00 |
| FA               | 1945-2018 | 1945-2018 | 85449     | 85449    | 0         | 100.00 | FTC               | 1952-2018 | 1982-2018 | 7443     | 7432      | 11   | 99.85  | Familial Adenomatous Polyposis | 1947-2018 | 1986-2018 | 47392   | 47303   | 89   | 99.81  |
| Fe               | 1945-2019 | 1945-2018 | 572716    | 572705   | 11        | 100.00 | Fish              | 1945-2019 | 1945-2018 | 305099   | 305099    | 55   | 99.98  | Foliolate                      | 1945-2018 | 1949-2018 | 71646   | 71632   | 14   | 99.98  |
| Follicles        | 1945-2018 | 1949-2018 | 127371    | 127354   | 17        | 99.99  | GAG               | 1947-2018 | 1949-2018 | 50174    | 50167     | 7    | 99.99  | Ganglion                       | 1945-2018 | 1946-2018 | 17719   | 17718   | 1    | 99.99  |
| Gas              | 1945-2018 | 1945-2018 | 55642     | 55642    | 0         | 100.00 | Glycoside         | 1945-2018 | 1946-2018 | 25627    | 25626     | 1    | 100.00 | HCI                            | 1945-2018 | 1946-2018 | 20316   | 20315   | 1    | 100.00 |
| HGF              | 1945-2018 | 1945-2018 | 432707    | 432677   | 30        | 99.99  | HIV 8             | 1946-2018 | 1953-2018 | 96870    | 96841     | 29   | 99.97  | HIV                            | 1985-2019 | 1985-2018 | 1750664 | 1750634 | 30   | 100.00 |
| HPS              | 1994-2018 | 1994-2018 | 4275      | 4275     | 0         | 100.00 | HR                | 1945-2018 | 1947-2018 | 290905   | 290900    | 5    | 100.00 | Haemophilus ducreyi            | 1945-2018 | 1977-2018 | 2749    | 2613    | 136  | 95.05  |
| Hemlock          | 1954-2018 | 2002-2018 | 1566      | 1530     | 36        | 97.70  | Heregulin         | 1992-2018 | 1992-2018 | 6798     | 6798      | 0    | 100.00 | Hip                            | 1945-2018 | 1946-2018 | 27747   | 27744   | 3    | 99.99  |
| IA               | 1945-2018 | 1946-2018 | 10020     | 10019    | 1         | 99.99  | Indo              | 1946-2018 | 1949-2018 | 82031    | 82029     | 2    | 100.00 | IP                             | 1947-2018 | 1986-2018 | 34267   | 34142   | 125  | 99.64  |
| Ice              | 1945-2019 | 1946-2018 | 103194    | 103190   | 4         | 100.00 | Ion               | 1945-2018 | 1945-2018 | 105091   | 105091    | 0    | 100.00 | Iris                           | 1944-2018 | 1945-2018 | 24499   | 24498   | 1    | 100.00 |
| JP               | 1945-2018 | 1946-2018 | 146654    | 146651   | 3         | 100.00 | LABOR             | 1945-2018 | 1945-2018 | 100015   | 100015    | 0    | 100.00 | Lactation                      | 1945-2019 | 1945-2018 | 204600  | 204561  | 39   | 99.98  |
| Language         | 1945-2018 | 1946-2018 | 110164    | 110163   | 1         | 100.00 | Larygeal          | 1945-2018 | 1945-2018 | 33207    | 33207     | 0    | 100.00 | Lawsonia                       | 1999-2018 | 2000-2018 | 781     | 778     | 3    | 99.62  |
| Leishmaniasis    | 1945-2018 | 1945-2018 | 15696     | 15696    | 0         | 100.00 | Lupus             | 1945-2018 | 1945-2018 | 257968   | 257968    | 0    | 100.00 | MAF                            | 1980-2018 | 1980-2018 | 2603    | 2603    | 0    | 100.00 |
| MBP              | 1972-2018 | 1973-2018 | 52691     | 52688    | 3         | 99.99  | MCC               | 1953-2018 | 1988-2018 | 13026    | 13025     | 1    | 99.99  | MHC                            | 1975-2018 | 1978-2018 | 62118   | 62115   | 3    | 100.00 |
| MRS              | 1947-2018 | 1950-2018 | 47126     | 47125    | 1         | 100.00 | Malaria           | 1945-2019 | 1945-2018 | 358254   | 358235    | 19   | 99.98  | Medullary                      | 1945-2018 | 1946-2018 | 33690   | 33687   | 3    | 99.99  |
| Milk             | 1945-2018 | 1945-2018 | 305750    | 305728   | 22        | 99.99  | Moles             | 1945-2018 | 1946-2018 | 15138    | 15135     | 3    | 99.99  | Murine sarcoma virus           | 1970-2015 | 2019-2018 | 1940    | 0       | 0.00 |        |
| NBS              | 1945-2019 | 1947-2018 | 81867     | 81864    | 3         | 100.00 | NEUROFIBROMATOSIS | 1945-2018 | 1990-2018 | 12180    | 11716     | 464  | 96.19  | NM                             | 1946-2018 | 1946-2018 | 10239   | 10239   | 0    | 100.00 |
| NPC              | 1959-2018 | 1998-2018 | 21594     | 21594    | 15        | 99.93  | Nurse             | 1945-2018 | 1945-2018 | 239675   | 239675    | 0    | 100.00 | Nursing                        | 1945-2018 | 1945-2018 | 172243  | 172243  | 0    | 100.00 |
| OC               | 1946-2018 | 1975-2018 | 57668     | 57464    | 204       | 99.65  | OH                | 1945-2019 | 1946-2018 | 37953    | 37951     | 2    | 99.99  | ORI                            | 1983-2018 | 1993-2018 | 15381   | 15375   | 6    | 99.96  |
| Orf              | 1946-2019 | 1980-2018 | 86612     | 86489    | 123       | 99.86  | PAC               | 1949-2018 | 1995-2018 | 1360     | 1353      | 7    | 99.49  | PAF                            | 1979-2018 | 1979-2018 | 55654   | 55654   | 0    | 100.00 |
| PCA              | 1945-2019 | 1957-2018 | 84955     | 84911    | 44        | 99.95  | PCB               | 1970-2019 | 1971-2018 | 96634    | 96610     | 24   | 99.98  | PCD                            | 1946-2019 | 1971-2018 | 1240782 | 1240583 | 199  | 99.98  |
| PCP              | 1951-2018 | 1972-2018 | 28148     | 28076    | 72        | 99.74  | PEP               | 1950-2018 | 1971-2018 | 6007     | 5989      | 18   | 99.70  | PHA                            | 1949-2018 | 1975-2018 | 21563   | 21411   | 152  | 99.30  |
| POL              | 1946-2019 | 1946-2018 | 38355     | 38354    | 1         | 100.00 | PR                | 1945-2018 | 1945-2018 | 76865    | 76865     | 0    | 100.00 | PVC                            | 1946-2019 | 1974-2018 | 18101   | 17934   | 167  | 99.08  |
| Panotitis        | 1945-2018 | 1945-2018 | 14688     | 14688    | 0         | 100.00 | Pharmaceutical    | 1944-2018 | 1945-2018 | 11130    | 11039     | 1    | 100.00 | Phosphorus                     | 1945-2019 | 1945-2018 | 197900  | 197842  | 58   | 99.97  |
| Phosphorylase    | 1946-2018 | 1971-2018 | 9398      | 8807     | 591       | 93.71  | Plague            | 1944-2018 | 1945-2018 | 20350    | 20349     | 1    | 100.00 | Plaque                         | 1946-2018 | 1950-2018 | 62726   | 62715   | 11   | 99.98  |
| Platelet         | 1945-2019 | 1945-2018 | 494007    | 493972   | 35        | 99.99  | Pneuropneumonia   | 1945-2018 | 1945-2018 | 22465    | 22465     | 0    | 100.00 | Polymyalgia Rheumatica         | 1946-2018 | 1957-2018 | 25082   | 25056   | 26   | 99.90  |
| Poussium         | 1945-2019 | 1945-2018 | 235537    | 235521   | 16        | 99.99  | Projection        | 1946-2018 | 1970-2018 | 29708    | 29468     | 240  | 99.19  | RA                             | 1945-2018 | 1945-2018 | 440554  | 440554  | 0    | 100.00 |
| RB               | 1946-2018 | 1947-2018 | 43903     | 43901    | 2         | 100.00 | RBC               | 1945-2019 | 1945-2018 | 364943   | 364940    | 3    | 100.00 | RSV                            | 1948-2018 | 1955-2018 | 52397   | 52388   | 9    | 99.98  |
| Radiation        | 1944-2018 | 1945-2018 | 162296    | 162294   | 2         | 100.00 | Respiration       | 1945-2018 | 1945-2018 | 119854   | 119854    | 0    | 100.00 | Retinal                        | 1944-2018 | 1945-2018 | 383905  | 383903  | 2    | 100.00 |
| Root             | 1945-2019 | 1945-2018 | 376231    | 376203   | 28        | 99.99  | SARS              | 1953-2018 | 2002-2018 | 62411    | 62409     | 2    | 100.00 | SARS-associated coronavirus    | 1953-2018 | 2002-2018 | 62411   | 62409   | 2    | 100.00 |
| SCD              | 1945-2019 | 1946-2018 | 81011     | 80930    | 81        | 99.90  | SLS               | 1945-2019 | 1971-2018 | 29857    | 29779     | 78   | 99.74  | SPR                            | 1981-2019 | 1981-2018 | 39679   | 39670   | 9    | 99.98  |
| SS               | 1945-2018 | 1948-2018 | 14413     | 14410    | 3         | 99.98  | STEM              | 1945-2018 | 1992-2018 | 27105    | 26926     | 179  | 99.34  | Schistosoma mansoni            | 1945-2018 | 1971-2018 | 21689   | 21036   | 653  | 96.99  |
| Sodium           | 1945-2019 | 1945-2018 | 299276    | 299274   | 2         | 100.00 | Suph              | 1945-2018 | 1945-2018 | 37349    | 37349     | 0    | 100.00 | Sterilization                  | 1945-2018 | 1945-2018 | 19072   | 19072   | 0    | 100.00 |
| Strept           | 1945-2019 | 1945-2018 | 36074     | 36051    | 43        | 99.88  | Synapsis          | 1945-2018 | 1950-2018 | 130490   | 130465    | 25   | 99.98  | TAT                            | 1945-2018 | 1945-2018 | 29858   | 29850   | 268  | 99.10  |
| TEM              | 1950-2019 | 2002-2018 | 32993     | 38618    | 675       | 98.28  | THYMUS            | 1945-2018 | 1946-2018 | 120292   | 120289    | 3    | 100.00 | TLC                            | 1954-2019 | 1959-2018 | 25152   | 25147   | 5    | 99.98  |
| TMJ              | 1946-2018 |           |           |          |           |        |                   |           |           |          |           |      |        |                                |           |           |         |         |      |        |

which is the probabilistic equivalent of matching  $G_i$  with several different clusters. Again, this issue is more likely to happen when there is imbalance between the senses: the majority class  $G_i$  is likely to obtain the highest  $P(G_i|C_j)$  against several clusters, thus becoming the winning sense for any new instance  $x$  predicted with a high probability of the corresponding clusters. The table below shows the mapping matrix for the example.

| $C_j$ | $G_1$       | $G_2$ | $G_3$       |
|-------|-------------|-------|-------------|
| $C_0$ | <b>0.45</b> | 0.24  | 0.30        |
| $C_1$ | 0.02        | 0.26  | <b>0.71</b> |
| $C_2$ | <b>0.74</b> | 0.01  | 0.24        |

The mapping matrix is used to transform the cluster probabilities into sense probabilities. For example, given two instances  $x$  and  $y$  with respective probability vectors  $[C_0 = 1, C_1 = 0, C_2 = 0]$  and  $[C_0 = 0, C_1 = 0, C_2 = 1]$ , multiplying these vectors with the above matrix gives  $G_1$  as the highest probability in both cases. This means that this evaluation method considers the two instances as both predicted as  $G_1$ , even though they belong to different clusters.
